# Supplementary material for: The Effect of Phosphate on the Activity and Sensitivity of Nutritropism toward Ammonium in Rice Roots
Source: MDPI journal article supplement (doi:10.3390/plants11060733), 2022-03-09
Supplement: s1 [file s1]

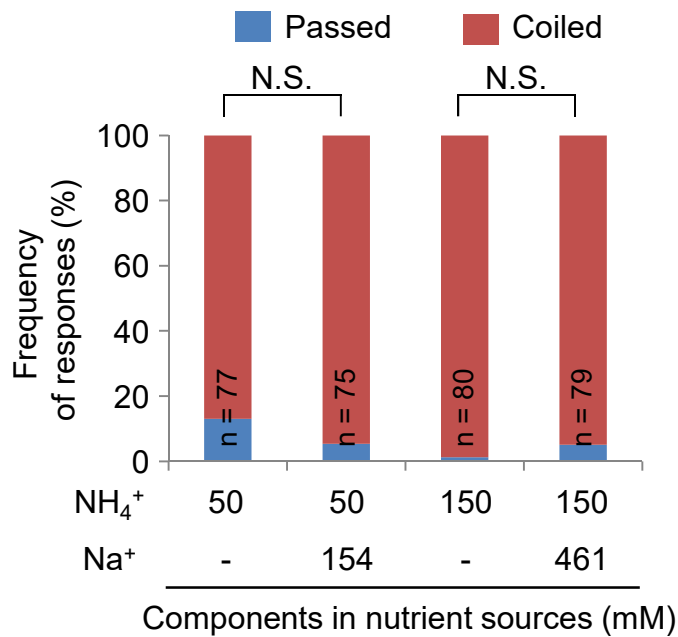

Supplementary Figure S3. Effect of Na<sup>+</sup> on nutritropic response of main roots (passed or coiled) of WRC 25. Frequencies of passed and coiled responses were determined in the nutritropic bioassay with 50 mM NH<sub>4</sub><sup>+</sup> + 150 mM Na<sup>+</sup> and with 154 mM NH<sub>4</sub><sup>+</sup> + 461 mM Na<sup>+</sup>. The Na<sup>+</sup> (derived from NaCl) concentrations were adjusted to match the concentrations in 100 mM and 300 mM Pi, where Na<sup>+</sup> from NaOH for neutralization and NaH<sub>2</sub>PO<sub>4</sub>. Statistical significance was tested using Fisher's exact test. N.S., not significant.
