# Supplementary material for: The Effect of Phosphate on the Activity and Sensitivity of Nutritropism toward Ammonium in Rice Roots
Source: MDPI journal article supplement (doi:10.3390/plants11060733), 2022-03-09
Supplement: s1 [file s1]

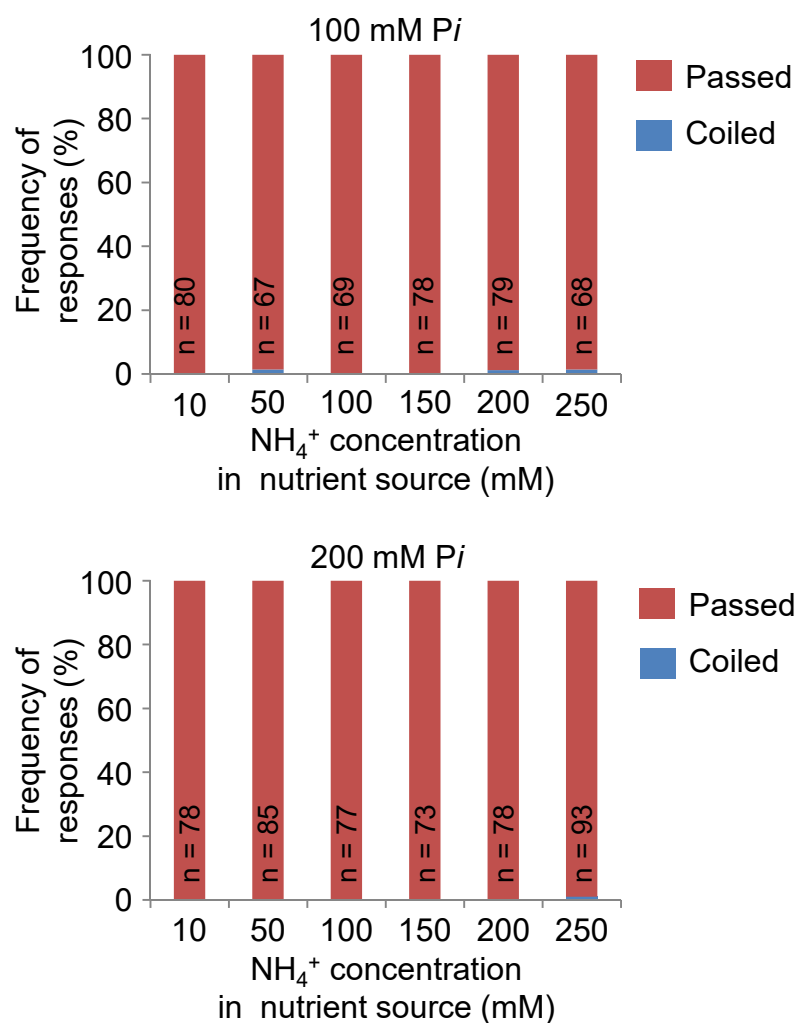

Supplementary Figure S5. Nutritropic responses of main root (passed or coiled) of WRC 1 to various concentrations of  $NH_4^+$  and  $P_i$ . Frequencies of passed and coiled responses were determined in the nutritropic bioassay with nutrient sources containing  $NH_4^+$  and  $P_i$  at the indicated concentrations.
