# Supplementary material for: The Effect of Phosphate on the Activity and Sensitivity of Nutritropism toward Ammonium in Rice Roots
Source: MDPI journal article supplement (doi:10.3390/plants11060733), 2022-03-09
Supplement: s1 [file s1]

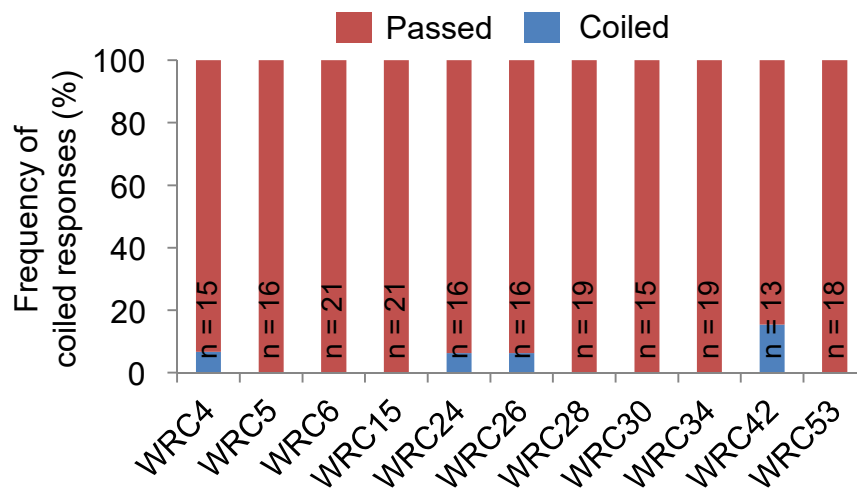

Supplementary Figure S2. Nutritropic responses of main roots (passed or coiled) of the top 11 accessions of WRCs showing coiled response in Supplementary Figure S1 (except WRC 25) to sole  $\text{NH}_4^+$ . Frequencies of passed and coiled responses were determined in the nutritropic bioassay with nutrient sources containing 200 mM  $\text{NH}_4^+$ .
